# Supplementary material
Source: publisher site journal article supplement (https://www.dovepress.com/article/165893)
Supplement: Supplementary file 1 [file get_supplementary_file.php]

## Supplementary materials

### APPENDIX

*Sampling of experimental linguistic constructions in affirmative and negative pattern*  
Non-factive verbs

1 (affirmative) O Pávlos prótine ston Tásο na taksidépsi argótera.

Pavlos proposed Tasos to travel later.

Who might have traveled later?

1a. Tasos (the Y)

1b. Pavlos (the X)

1c. I cannot decide who might have traveled later

1 (negative) O Pávlos den prótine ston Tásο na taksidépsi argótera.

Pavlos didn't propose Tasos to travel later.

Who might have not traveled later?

1a. Tasos (the Y)

1b. Pavlos (the X)

1c. I cannot decide who might have not traveled later

2 (affirmative) O Yórgos sinfónise me ton Miháli na alláksi to prógramma ton kalokerinón diakopón.

Yorgos proposed Mihalis to change the summer holiday schedule.

Who might have changed the schedule?

2a. Yorgos (the X)

2b. Mihalis (the Y)

2c. I cannot decide who might have changed the schedule

2 (negative) O Yórgos den sinfónise me ton Miháli na alláksi to prógramma ton kalokerinón diakopón.

Yorgos did not propose Mihalis to change the summer holiday schedule.

Who might have not changed the schedule?

2a. Yorgos (the X)

2b. Mihalis (the Y)

2c. I cannot decide who might have not changed the schedule

3 (affirmative) O Stávros iposhéthike ston Alexi na agorási perissótera vivlíα.

Stavros promised Alexis to buy more books.

Who might have bought more books?

3a. Stavros (the X)

3b. Alexis (the Y)

3c. I cannot decide who might have bought more books

3 (negative) O Stávros den iposhéthike ston Alexi na agorási perissótera vivlíα.

Stavros didn't promise Alexis to buy more books.

Who might have not bought more books?

3a. Alexis (the Y)

3b. Stavros (the X)

3c. I cannot decide who might have not bought more books

Factive verbs

1 (affirmative) I Chrisí thimíthike na apantísi éngera stin epistolí  
Chrisi remembered to answer the letter in time.

Is it true that:

- 1a. the letter might have been answered in time
- 1b. the letter was not answered in time
- 1c. the letter was answered in time

1 (negative) I Chrisí den thimíthike na apantísi éngera stin epistolí  
Chrisi didn't remember to answer the letter in time.

Is it true that:

- 1a. the letter was not answered in time
- 1b. the letter might have been answered in time
- 1c. the letter was answered in time

2 (affirmative) O Kiriákos lismónise na klidósi tin pórtá tou spitioú  
Kiriakos forgot to lock the door of the house.

Is it true that:

- 1a. the door of the house was locked
- 1b. the door of the house was not locked
- 1c. the door of the house might haven't been locked

2 (negative) O Kiriákos den lismónise na klidósi tin pórtá tou spitioú  
Kiriakos didn't forget to lock the door of the house.

Is it true that:

- 1a. the door of the house was locked
- 1b. the door of the house might haven't been locked
- 1c. the door of the house was not locked

3 (affirmative) I Eléni gnórizē óti i Lukía éfige norís to prói  
Helen knew that Lucia left early in the morning.

Is it true that:

- 1a. Lucia didn't leave early in the morning
- 1b. Lucia might have left early in the morning
- 1c. Lucia left early in the morning

3 (negative) I Eléni den gnórizē óti i Lukía éfige norís to prói  
Helen didn't know that Lucia left early in the morning.

Is it true that:

- 1a. Lucia might have left early in the morning
- 1b. Lucia didn't leave early in the morning
- 1c. Lucia left early in the morning

*The stimuli of the SMVUT and the CMVUT in the pseudo-randomized order in which were presented to the participants.*

1. Anthimos proposed Perikles to play basketball with the school team.  
Who might have played basketball?

- 1a. Perikles
- 1b. Anthimos
- 1c. I cannot decide who might have played basketball

2. Lucia didn't know that Irene came back from holiday.

Is it true that:

2a. Irene didn't come back from holiday

2b. Irene might have come back from holiday

2c. Irene came back from holiday

3. Pavlos agreed with Christos to spend less money.

Who might have spent less money?

3a. Christos

3b. Pavlos

3c. I cannot decide who might have spent less money

4. Socrates didn't forget to return the books to the library in time.

Is it true that:

4a. The books might have not been returned on time

4b. The books were not returned on time

4c. The books were returned on time

5. Stavros didn't promise Alexis to buy more books.

Who might have not bought more books?

5a. Stavros

5b. Alexis

5c. I cannot decide who might have not bought more books

6. Chrisi remembered to answer to the letter in time.

Is it true that:

6a. The letter was not answered in time

6b. The letter might have been answered in time

6c. The letter was answered in time

7. Yorgos didn't propose Mihalis to change the summer holiday schedule.

Who might have not changed the schedule?

7a. Yorgos

7b. Mihalis

7c. I cannot decide who might have not changed the schedule

8. Kyriakos forgot to lock the door

Is it true that:

8a. The door was locked

8b. The door might have been locked

8c. The door was not locked

9. Mihalis promised Giannes to invite a lot of friends to the party.

Who might have invited a lot of friends?

9a. Giannes

9b. Mihalis

9c. I cannot decide who might have invited a lot of friends

10. Chrisanthi didn't remember to pay the installment of the loan.

Is it true that:

- 10a. The installment of the loan was paid
- 10b. The installment of the loan wasn't paid
- 10c. The installment of the loan might have been paid

11. Fotis didn't agree with Takis to be paid at the end of each week.

Who might have not been paid in the end of each week?

- 11a. Fotis
- 11b. Takis
- 11c. I cannot decide who might have not been paid in the end of each week

12. Maria didn't know that Georgia bought a lot of books.

Is it true that:

- 12a. Georgia might have bought a lot of books
- 12b. Georgia did not buy a lot of books
- 12c. Georgia bought a lot of books

13. Pavlos proposed Tasos to travel later.

Who might have traveled later?

- 13a. Tasos
- 13b. Pavlos
- 13c. I cannot decide who might have traveled later

14. Charis didn't forget to leash the dog.

Is it true that:

- 14a. The dog was not leashed
- 14b. The dog was leashed
- 14c. The dog might have been leashed

15. Kostas didn't promise Yorgos to drive the car.

Who might have not driven the car?

- 15a. Kostas
- 15b. Yorgos
- 15c. I cannot decide who might have not driven the car

16. Ioanna didn't remember to feed the dog in the morning.

Is it true that:

- 16a. The dog might have been fed in the morning
- 16b. The dog was not fed in the morning
- 16c. The dog was fed in the morning

17. Dimos agreed with Basilis to work more time.

Who might have worked more time?

- 17a. Basilis
- 17b. Dimos
- 17c. I cannot decide who might have worked more time

18. Eleni knew that Lucia left early in the morning.

Is it true that:

- 18a. Lucia did not leave early in the morning

18b. Lucia might have left early in the morning

18c. Lucia left early in the morning

19. Grigoris didn't propose Petros to sell the old car.

Who might have not sold the old car?

19a. Grigoris

19b. Petros

19c. I cannot decide who might have not sold the old car

20. Antonis forgot to send wishes for his friend's birthday.

Is it true that:

20a. Antonis's friend might have received wishes

20b. Antonis's friend did not receive wishes

20c. Antonis's friend received wishes

21. Nikos promised Thanos to travel the next day.

Who might have traveled the next day?

21a. Thanos

21b. Nikos

21c. I cannot decide who might have traveled the next day

22. Fotini remembered to lend books to Eleftheria.

Is it true that:

22a. Eleftheria was lent books

22b. Eleftheria might have lent books

22c. Eleftheria was not lent books

23. Sotiris didn't agree with Andreas to visit the new museum.

Who might have not visited the new museum?

24a. Sotiris

24b. Andreas

24c. I cannot decide who might have not visited the new museum

24. Maria knew that Eleni travelled.

Is it true that:

24a. Eleni travelled

24b. Eleni did not travel

24c. Eleni might have travelled



## SUPPLEMENTARY MATERIAL

### One-factor solution vs. two-factor solution for the SMVUT model without the old-old adult group

EQS, A STRUCTURAL EQUATION PROGRAM  
COPYRIGHT BY P.M. BENTLER

MULTIVARIATE SOFTWARE, INC.  
VERSION 6.1 (C) 1985 - 2005 (B85).

#### PROGRAM CONTROL INFORMATION

```
1  /TITLE
2  Model built by EQS 6 for Windows
3  /SPECIFICATIONS
4  DATA='c:\users\user\desktop\berlinverbswithoutoldest_1.ess';
5  VARIABLES=71; CASES=86;
6  METHOD=ML,ROBUST; ANALYSIS=COVARIANCE; MATRIX=RAW;
7  /LABELS
8  V1=CODE; V2=GENDER; V3=AGECAT; V4=AGE; V5=EDUC;
9  V6=XARA; V7=EKPLIXI; V8=OUDETERO; V9=LIPIMENO; V10=THUMOS;
10 V11=AGXOS; V12=AIDIA; V13=CORRECT; V14=RANGE; V15=PR1P;
11 V16=GN1N; V17=S1P; V18=L1N; V19=Y1N; V20=TH1P;
12 V21=P1N; V22=PR2N; V23=L2P; V24=Y2P; V25=TH2N;
13 V26=P2P; V27=S2N; V28=GN2N; V29=PR3P; V30=L3N;
14 V31=Y3N; V32=TH3N; V33=P3N; V34=S3P; V35=GN3P;
15 V36=PR4N; V37=L4P; V38=Y4P; V39=TH4P; V40=P4P;
16 V41=GN4P; V42=S4N; V43=PRP; V44=PRN; V45=SP;
17 V46=SN; V47=YP; V48=YN; V49=PP; V50=PN;
18 V51=PROTOTAL; V52=SYMFVNVT; V53=YPOSXOMA; V54=PISTEYVT; V55=SYNOLOPR;
19 V56=SYNOLOSY; V57=SYNOLOY; V58=SYNOLOPI; V59=TASITDEC; V60=TOTALPOS;
20 V61=TOTALNEG; V62=FACTIVEP; V63=FACTIVEN; V64=TOTALNON; V65=TOTALFAC;
21 V66=GNORIZOP; V67=GNORIZON; V68=LISMOMOP; V69=LISMOMON; V70=THYMAMAI;
22 V71=V71_A;
23 /EQUATIONS
24 V43 = 1F1 + E43;
25 V44 = *F1 + E44;
26 V45 = *F1 + E45;
27 V46 = *F1 + E46;
```

```

28 V47 = *F1 + E47;
29 V48 = *F1 + E48;
30 /VARIANCES
31 F1 = *;
32 E43 = *;
33 E44 = *;
34 E45 = *;
35 E46 = *;
36 E47 = *;
37 E48 = *;
38 /COVARIANCES
39 E45,E43 = *;
40 /PRINT
41 FIT=ALL;
42 TABLE=EQUATION;
43 /LMTEST
44 PROCESS=SIMULTANEOUS;
45 SET=PVV, PFV, PFF, PDD, GVV, GVF, GFV, GFF,
46 BVF, BFF;
47 /WTEST
48 PVAL=0.05;
49 PRIORITY=ZERO;
50 /END

```

50 RECORDS OF INPUT MODEL FILE WERE READ

DATA IS READ FROM c:\users\user\desktop\berlinverbswithoutoldest\_1.ess  
THERE ARE 71 VARIABLES AND 86 CASES  
IT IS A RAW DATA ESS FILE



02-Aug-18      PAGE : 2   EQS      Licensee:  
TITLE:    Model built by EQS 6 for Windows

SAMPLE STATISTICS BASED ON COMPLETE CASES

UNIVARIATE STATISTICS

| VARIABLE      | PRP<br>V43 | PRN<br>V44 | SP<br>V45 | SN<br>V46 | YP<br>V47 |
|---------------|------------|------------|-----------|-----------|-----------|
| MEAN          | .3372      | .5814      | .5116     | .7093     | .1860     |
| SKEWNESS (G1) | 1.5348     | .8950      | .9669     | .5732     | 2.3693    |
| KURTOSIS (G2) | 1.2998     | -.8511     | -.2899    | -1.2272   | 5.0148    |
| STANDARD DEV. | .5863      | .8039      | .6816     | .8097     | .4475     |

| VARIABLE      | YN<br>V48 |
|---------------|-----------|
| MEAN          | .5581     |
| SKEWNESS (G1) | .8429     |
| KURTOSIS (G2) | -.5213    |
| STANDARD DEV. | .6963     |

MULTIVARIATE KURTOSIS

-----  
MARDIA'S COEFFICIENT (G2,P) = 14.8015  
NORMALIZED ESTIMATE = 7.0047

BONETT-WOODWARD-RANDALL TEST SHOWS SIGNIFICANT EXCESS KURTOSIS  
INDICATIVE OF NON-NORMALITY AT A ONE-TAIL .05 LEVEL.

ELLIPTICAL THEORY KURTOSIS ESTIMATES  
-----

MARDIA-BASED KAPPA = .3084 MEAN SCALED UNIVARIATE KURTOSIS = .1903  
MARDIA-BASED KAPPA IS USED IN COMPUTATION. KAPPA= .3084

CASE NUMBERS WITH LARGEST CONTRIBUTION TO NORMALIZED MULTIVARIATE KURTOSIS:  
-----

| CASE NUMBER | 6       | 15       | 26       | 34       | 43       |
|-------------|---------|----------|----------|----------|----------|
| ESTIMATE    | 93.5890 | 182.5853 | 135.7264 | 139.2267 | 270.4189 |

02-Aug-18            PAGE :   3   EQS            Licensee:  
TITLE:    Model built by EQS 6 for Windows

COVARIANCE MATRIX TO BE ANALYZED: 6 VARIABLES (SELECTED FROM 71 VARIABLES)  
BASED ON 86 CASES.

|     |     | PRP  | PRN  | SP   | SN   | YP   |
|-----|-----|------|------|------|------|------|
|     |     | V43  | V44  | V45  | V46  | V47  |
| PRP | V43 | .344 |      |      |      |      |
| PRN | V44 | .237 | .646 |      |      |      |
| SP  | V45 | .249 | .217 | .465 |      |      |
| SN  | V46 | .229 | .395 | .315 | .656 |      |
| YP  | V47 | .078 | .091 | .092 | .184 | .200 |
| YN  | V48 | .174 | .283 | .170 | .270 | .107 |
|     |     | YN   |      |      |      |      |
|     |     | V48  |      |      |      |      |
| YN  | V48 | .485 |      |      |      |      |

BENTLER-WEEKS STRUCTURAL REPRESENTATION:

NUMBER OF DEPENDENT VARIABLES = 6  
DEPENDENT V'S : 43 44 45 46 47 48

|                                   |    |    |    |    |    |    |
|-----------------------------------|----|----|----|----|----|----|
| NUMBER OF INDEPENDENT VARIABLES = | 7  |    |    |    |    |    |
| INDEPENDENT F'S :                 | 1  |    |    |    |    |    |
| INDEPENDENT E'S :                 | 43 | 44 | 45 | 46 | 47 | 48 |

NUMBER OF FREE PARAMETERS = 13  
NUMBER OF FIXED NONZERO PARAMETERS = 7

\*\*\* WARNING MESSAGES ABOVE, IF ANY, REFER TO THE MODEL PROVIDED.

CALCULATIONS FOR INDEPENDENCE MODEL NOW BEGIN.

\*\*\* WARNING MESSAGES ABOVE, IF ANY, REFER TO INDEPENDENCE MODEL.  
CALCULATIONS FOR USER'S MODEL NOW BEGIN.

3RD STAGE OF COMPUTATION REQUIRED        8393 WORDS OF MEMORY.  
PROGRAM ALLOCATED    2000000 WORDS

DETERMINANT OF INPUT MATRIX IS    .71446D-03

PARAMETER ESTIMATES APPEAR IN ORDER,  
NO SPECIAL PROBLEMS WERE ENCOUNTERED DURING OPTIMIZATION.

RESIDUAL COVARIANCE MATRIX    (S-SIGMA) :

|     |     | PRP<br>V43 | PRN<br>V44 | SP<br>V45 | SN<br>V46 | YP<br>V47 |
|-----|-----|------------|------------|-----------|-----------|-----------|
| PRP | V43 | .000       |            |           |           |           |
| PRN | V44 | .033       | .000       |           |           |           |
| SP  | V45 | .000       | -.026      | .000      |           |           |
| SN  | V46 | -.020      | .001       | .020      | .000      |           |
| YP  | V47 | -.007      | -.043      | -.008     | .022      | .000      |
| YN  | V48 | .021       | .041       | -.012     | -.025     | .007      |

|    |     | YN<br>V48 |
|----|-----|-----------|
| YN | V48 | .000      |

|                      |            |            |           |       |       |
|----------------------|------------|------------|-----------|-------|-------|
| AVERAGE ABSOLUTE     | COVARIANCE | RESIDUALS  | =         | .0136 |       |
| AVERAGE OFF-DIAGONAL | ABSOLUTE   | COVARIANCE | RESIDUALS | =     | .0190 |

STANDARDIZED RESIDUAL MATRIX:

|     |     | PRP<br>V43 | PRN<br>V44 | SP<br>V45 | SN<br>V46 | YP<br>V47 |
|-----|-----|------------|------------|-----------|-----------|-----------|
| PRP | V43 | .000       |            |           |           |           |
| PRN | V44 | .069       | .000       |           |           |           |
| SP  | V45 | .000       | -.048      | .000      |           |           |
| SN  | V46 | -.042      | .001       | .036      | .000      |           |
| YP  | V47 | -.025      | -.120      | -.027     | .059      | .000      |
| YN  | V48 | .053       | .074       | -.025     | -.044     | .021      |

|    |     | YN<br>V48 |
|----|-----|-----------|
| YN | V48 | .000      |

|                                                      |   |       |
|------------------------------------------------------|---|-------|
| AVERAGE ABSOLUTE STANDARDIZED RESIDUALS              | = | .0307 |
| AVERAGE OFF-DIAGONAL ABSOLUTE STANDARDIZED RESIDUALS | = | .0429 |

LARGEST STANDARDIZED RESIDUALS:

| NO. | PARAMETER | ESTIMATE | NO. | PARAMETER | ESTIMATE |
|-----|-----------|----------|-----|-----------|----------|
| --- | -----     | -----    | --- | -----     | -----    |
| 1   | V47, V44  | -.120    | 11  | V47, V43  | -.025    |
| 2   | V48, V44  | .074     | 12  | V48, V45  | -.025    |
| 3   | V44, V43  | .069     | 13  | V48, V47  | .021     |
| 4   | V47, V46  | .059     | 14  | V46, V44  | .001     |
| 5   | V48, V43  | .053     | 15  | V46, V46  | .000     |
| 6   | V45, V44  | -.048    | 16  | V45, V45  | .000     |
| 7   | V48, V46  | -.044    | 17  | V47, V47  | .000     |
| 8   | V46, V43  | -.042    | 18  | V45, V43  | .000     |
| 9   | V46, V45  | .036     | 19  | V44, V44  | .000     |
| 10  | V47, V45  | -.027    | 20  | V48, V48  | .000     |

DISTRIBUTION OF STANDARDIZED RESIDUALS

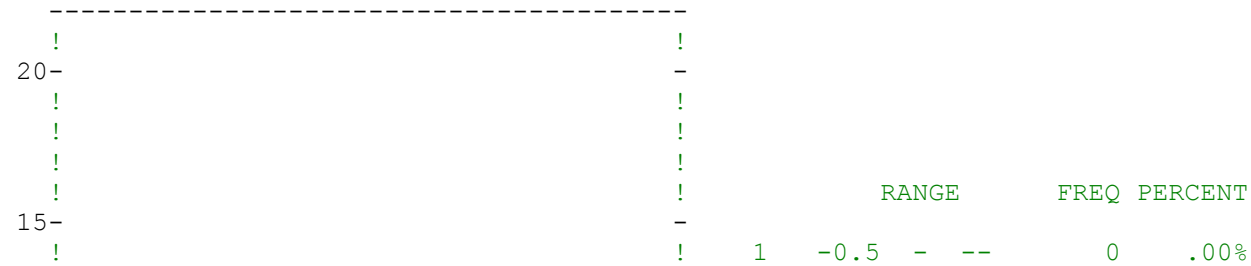



02-Aug-18        PAGE : 5    EQS        Licensee:  
TITLE:    Model built by EQS 6 for Windows

MAXIMUM LIKELIHOOD SOLUTION (NORMAL DISTRIBUTION THEORY)

GOODNESS OF FIT SUMMARY FOR METHOD = ML

INDEPENDENCE MODEL CHI-SQUARE                =        188.602 ON        15 DEGREES OF FREEDOM

INDEPENDENCE AIC =    158.60167    INDEPENDENCE CAIC =    106.78646  
      MODEL AIC =    -1.07129        MODEL CAIC =    -28.70607

CHI-SQUARE =            14.929 BASED ON            8 DEGREES OF FREEDOM  
PROBABILITY VALUE FOR THE CHI-SQUARE STATISTIC IS            .06055

THE NORMAL THEORY RLS CHI-SQUARE FOR THIS ML SOLUTION IS            14.422.

FIT INDICES

-----

|                  |                                |   |             |
|------------------|--------------------------------|---|-------------|
| BENTLER-BONETT   | NORMED FIT INDEX               | = | .921        |
| BENTLER-BONETT   | NON-NORMED FIT INDEX           | = | .925        |
| COMPARATIVE      | FIT INDEX (CFI)                | = | .960        |
| BOLLEN           | (IFI) FIT INDEX                | = | .962        |
| MCDONALD         | (MFI) FIT INDEX                | = | .961        |
| LISREL           | GFI FIT INDEX                  | = | .946        |
| LISREL           | AGFI FIT INDEX                 | = | .859        |
| ROOT MEAN-SQUARE | RESIDUAL (RMR)                 | = | .019        |
| STANDARDIZED     | RMR                            | = | .044        |
| ROOT MEAN-SQUARE | ERROR OF APPROXIMATION (RMSEA) | = | .101        |
| 90% CONFIDENCE   | INTERVAL OF RMSEA              | ( | .000, .178) |

RELIABILITY COEFFICIENTS

-----



CRONBACH'S ALPHA = .826  
 COEFFICIENT ALPHA FOR AN OPTIMAL SHORT SCALE = .827  
 BASED ON 5 VARIABLES, ALL EXCEPT:  
 YP  
 RELIABILITY COEFFICIENT RHO = .835  
 GREATEST LOWER BOUND RELIABILITY = .903  
 GLB RELIABILITY FOR AN OPTIMAL SHORT SCALE = .903  
 BASED ON ALL VARIABLES  
 BENTLER'S DIMENSION-FREE LOWER BOUND RELIABILITY = .902  
 SHAPIRO'S LOWER BOUND RELIABILITY FOR A WEIGHTED COMPOSITE = .910  
 WEIGHTS THAT ACHIEVE SHAPIRO'S LOWER BOUND:

| PRP  | PRN  | SP   | SN   | YP   | YN   |
|------|------|------|------|------|------|
| .374 | .476 | .435 | .541 | .263 | .289 |

MAXIMAL INTERNAL CONSISTENCY RELIABILITY = .856  
 MAXIMAL RELIABILITY CAN BE OBTAINED BY WEIGHTING THE VARIABLES AS FOLLOWS:

| PRP  | PRN  | SP   | SN    | YP   | YN   |
|------|------|------|-------|------|------|
| .685 | .725 | .621 | 1.607 | .665 | .575 |

# GOODNESS OF FIT SUMMARY FOR METHOD = ROBUST

ROBUST INDEPENDENCE MODEL CHI-SQUARE = 138.134 ON 15 DEGREES OF FREEDOM

|                    |           |                     |           |
|--------------------|-----------|---------------------|-----------|
| INDEPENDENCE AIC = | 108.13366 | INDEPENDENCE CAIC = | 56.31845  |
| MODEL AIC =        | -6.48314  | MODEL CAIC =        | -34.11792 |

SATORRA-BENTLER SCALED CHI-SQUARE = 9.5169 ON 8 DEGREES OF FREEDOM  
 PROBABILITY VALUE FOR THE CHI-SQUARE STATISTIC IS .30059

RESIDUAL-BASED TEST STATISTIC = 8.313  
 PROBABILITY VALUE FOR THE CHI-SQUARE STATISTIC IS .40353

YUAN-BENTLER RESIDUAL-BASED TEST STATISTIC = 7.580  
 PROBABILITY VALUE FOR THE CHI-SQUARE STATISTIC IS .47553

YUAN-BENTLER RESIDUAL-BASED F-STATISTIC = .954  
 DEGREES OF FREEDOM = 8, 78  
 PROBABILITY VALUE FOR THE F-STATISTIC IS .47834

# FIT INDICES

-----

BENTLER-BONETT NORMED FIT INDEX = .931  
 BENTLER-BONETT NON-NORMED FIT INDEX = .977  
 COMPARATIVE FIT INDEX (CFI) = .988  
 BOLLEN (IFI) FIT INDEX = .988  
 MCDONALD (MFI) FIT INDEX = .991  
 ROOT MEAN-SQUARE ERROR OF APPROXIMATION (RMSEA) = .047  
 90% CONFIDENCE INTERVAL OF RMSEA ( .000, .140)

## ITERATIVE SUMMARY

| ITERATION | PARAMETER<br>ABS CHANGE | ALPHA   | FUNCTION |
|-----------|-------------------------|---------|----------|
| 1         | .174662                 | 1.00000 | .41802   |
| 2         | .134222                 | 1.00000 | .19287   |
| 3         | .014803                 | 1.00000 | .17697   |
| 4         | .008350                 | 1.00000 | .17588   |
| 5         | .003853                 | 1.00000 | .17568   |
| 6         | .001572                 | 1.00000 | .17564   |
| 7         | .000745                 | 1.00000 | .17563   |

02-Aug-18      PAGE : 6   EQS      Licensee:  
TITLE:    Model built by EQS 6 for Windows

MAXIMUM LIKELIHOOD SOLUTION (NORMAL DISTRIBUTION THEORY)

MEASUREMENT EQUATIONS WITH STANDARD ERRORS AND TEST STATISTICS  
STATISTICS SIGNIFICANT AT THE 5% LEVEL ARE MARKED WITH @.  
(ROBUST STATISTICS IN PARENTHESES)

PRP    =V43 =   1.000 F1      +1.000 E43

PRN    =V44 =   1.586\*F1      +1.000 E44  
                 .315  
                 5.035@  
                 ( .311)  
                 ( 5.106@

SP     =V45 =   1.190\*F1      +1.000 E45  
                 .199  
                 5.968@  
                 ( .217)  
                 ( 5.476@

SN     =V46 =   1.928\*F1      +1.000 E46  
                 .352  
                 5.477@  
                 ( .366)  
                 ( 5.264@

YP      =V47 =    .654\*F1      +1.000 E47  
                 .163  
                 4.023@  
                 (    .219)  
                 ( 2.991@

YN      =V48 =    1.186\*F1      +1.000 E48  
                 .262  
                 4.533@  
                 (    .283)  
                 ( 4.189@

02-Aug-18      PAGE : 7   EQS      Licensee:  
TITLE:    Model built by EQS 6 for Windows

MAXIMUM LIKELIHOOD SOLUTION (NORMAL DISTRIBUTION THEORY)

VARIANCES OF INDEPENDENT VARIABLES

-----  
STATISTICS SIGNIFICANT AT THE 5% LEVEL ARE MARKED WITH @.

| V   |           | F         |
|-----|-----------|-----------|
| --- |           | ---       |
|     | I F1 - F1 | .129*I    |
|     | I         | .045 I    |
|     | I         | 2.872@I   |
|     | I         | ( .048) I |
|     | I         | ( 2.688@I |
|     | I         | I         |

02-Aug-18      PAGE : 8   EQS      Licensee:  
TITLE:    Model built by EQS 6 for Windows

MAXIMUM LIKELIHOOD SOLUTION (NORMAL DISTRIBUTION THEORY)

VARIANCES OF INDEPENDENT VARIABLES

-----  
STATISTICS SIGNIFICANT AT THE 5% LEVEL ARE MARKED WITH @.

|           | E         | D   |   |
|-----------|-----------|-----|---|
|           | ---       | --- |   |
| E43 - PRP | .215*I    |     | I |
|           | .037 I    |     | I |
|           | 5.733@I   |     | I |
|           | ( .044)I  |     | I |
|           | ( 4.856@I |     | I |
|           | I         |     | I |
| E44 - PRN | .322*I    |     | I |
|           | .062 I    |     | I |
|           | 5.232@I   |     | I |
|           | ( .069)I  |     | I |
|           | ( 4.655@I |     | I |
|           | I         |     | I |
| E45 - SP  | .282*I    |     | I |
|           | .050 I    |     | I |
|           | 5.677@I   |     | I |
|           | ( .052)I  |     | I |
|           | ( 5.427@I |     | I |
|           | I         |     | I |
| E46 - SN  | .177*I    |     | I |
|           | .055 I    |     | I |
|           | 3.209@I   |     | I |
|           | ( .064)I  |     | I |
|           | ( 2.745@I |     | I |
|           | I         |     | I |
| E47 - YP  | .145*I    |     | I |

E48 - YN

.024 I  
6.061@I  
( .034)I  
( 4.290@I  
I  
.304\*I  
.052 I  
5.786@I  
( .055)I  
( 5.512@I  
I

I  
I  
I  
I  
I  
I  
I  
I  
I  
I  
I

02-Aug-18      PAGE : 9   EQS      Licensee:  
TITLE:    Model built by EQS 6 for Windows

MAXIMUM LIKELIHOOD SOLUTION (NORMAL DISTRIBUTION THEORY)

COVARIANCES AMONG INDEPENDENT VARIABLES

-----  
STATISTICS SIGNIFICANT AT THE 5% LEVEL ARE MARKED WITH @.

|           | E         | D   |   |
|-----------|-----------|-----|---|
|           | ---       | --- |   |
| E45 - SP  | .096*I    |     | I |
| E43 - PRP | .034 I    |     | I |
|           | 2.832@I   |     | I |
|           | ( .031)I  |     | I |
|           | ( 3.106@I |     | I |
|           | I         |     | I |



02-Aug-18      PAGE : 10   EQS      Licensee:  
TITLE:    Model built by EQS 6 for Windows

MAXIMUM LIKELIHOOD SOLUTION (NORMAL DISTRIBUTION THEORY)

STANDARDIZED SOLUTION:

R-SQUARED

|     |        |         |            |      |
|-----|--------|---------|------------|------|
| PRP | =V43 = | .612 F1 | + .791 E43 | .375 |
| PRN | =V44 = | .708*F1 | + .706 E44 | .501 |
| SP  | =V45 = | .626*F1 | + .779 E45 | .392 |
| SN  | =V46 = | .855*F1 | + .519 E46 | .730 |
| YP  | =V47 = | .525*F1 | + .851 E47 | .276 |
| YN  | =V48 = | .611*F1 | + .791 E48 | .374 |

02-Aug-18      PAGE : 11   EQS      Licensee:  
TITLE:    Model built by EQS 6 for Windows

MAXIMUM LIKELIHOOD SOLUTION (NORMAL DISTRIBUTION THEORY)

CORRELATIONS AMONG INDEPENDENT VARIABLES

|           | E   |        | D   |   |
|-----------|-----|--------|-----|---|
|           | --- |        | --- |   |
| E45 - SP  |     | .389*I |     | I |
| E43 - PRP |     | I      |     | I |
|           |     | I      |     | I |

-----  
E N D      O F      M E T H O D  
-----

EQS, A STRUCTURAL EQUATION PROGRAM  
COPYRIGHT BY P.M. BENTLER

MULTIVARIATE SOFTWARE, INC.  
VERSION 6.1 (C) 1985 - 2005 (B85).

PROGRAM CONTROL INFORMATION

```
1  /TITLE
2  Model built by EQS 6 for Windows
3  /SPECIFICATIONS
4  DATA='c:\users\user\desktop\berlinverbswithoutoldest_1.ess';
5  VARIABLES=71; CASES=86;
6  METHOD=ML,ROBUST; ANALYSIS=COVARIANCE; MATRIX=RAW;
7  /LABELS
8  V1=CODE; V2=GENDER; V3=AGECAT; V4=AGE; V5=EDUC;
9  V6=XARA; V7=EKPLIXI; V8=OUDETERO; V9=LIPIMENO; V10=THUMOS;
10 V11=AGXOS; V12=AIDIA; V13=CORRECT; V14=RANGE; V15=PR1P;
11 V16=GN1N; V17=S1P; V18=L1N; V19=Y1N; V20=TH1P;
12 V21=P1N; V22=PR2N; V23=L2P; V24=Y2P; V25=TH2N;
13 V26=P2P; V27=S2N; V28=GN2N; V29=PR3P; V30=L3N;
14 V31=Y3N; V32=TH3N; V33=P3N; V34=S3P; V35=GN3P;
15 V36=PR4N; V37=L4P; V38=Y4P; V39=TH4P; V40=P4P;
16 V41=GN4P; V42=S4N; V43=PRP; V44=PRN; V45=SP;
17 V46=SN; V47=YP; V48=YN; V49=PP; V50=PN;
18 V51=PROTOTAL; V52=SYMFVNVT; V53=YPOXOMA; V54=PISTEYVT; V55=SYNOLOPR;
19 V56=SYNOLOSY; V57=SYNOLOYP; V58=SYNOLOPI; V59=TASITDEC; V60=TOTALPOS;
20 V61=TOTALNEG; V62=FACTIVEP; V63=FACTIVEN; V64=TOTALNON; V65=TOTALFAC;
21 V66=GNORIZOP; V67=GNORIZON; V68=LISMOMOP; V69=LISMOMON; V70=THYMAMAI;
22 V71=V71_A;
23 /EQUATIONS
24 V43 = 1F1 + E43;
25 V44 = 1F2 + E44;
26 V45 = *F1 + E45;
27 V46 = *F2 + E46;
28 V47 = *F1 + E47;
29 V48 = *F2 + E48;
30 /VARIANCES
```

```
31  F1 = *;  
32  F2 = *;  
33  E43 = *;  
34  E44 = *;  
35  E45 = *;  
36  E46 = *;  
37  E47 = *;  
38  E48 = *;  
39  /COVARIANCES  
40  F2,F1 = *;  
41  E45,E43 = *;  
42  /PRINT  
43  FIT=ALL;  
44  TABLE=EQUATION;  
45  /LMTEST  
46  PROCESS=SIMULTANEOUS;  
47  SET=PVV, PFV, PFF, PDD, GVV, GVF, GFV, GFF,  
48  BVF, BFF;  
49  /WTEST  
50  PVAL=0.05;  
51  PRIORITY=ZERO;  
52  /END
```

52 RECORDS OF INPUT MODEL FILE WERE READ

DATA IS READ FROM c:\users\user\desktop\berlinverbswithoutoldest\_1.ess  
THERE ARE 71 VARIABLES AND 86 CASES  
IT IS A RAW DATA ESS FILE

02-Aug-18      PAGE : 2   EQS      Licensee:  
TITLE:    Model built by EQS 6 for Windows

SAMPLE STATISTICS BASED ON COMPLETE CASES

UNIVARIATE STATISTICS

| VARIABLE      | PRP<br>V43 | PRN<br>V44 | SP<br>V45 | SN<br>V46 | YP<br>V47 |
|---------------|------------|------------|-----------|-----------|-----------|
| MEAN          | .3372      | .5814      | .5116     | .7093     | .1860     |
| SKEWNESS (G1) | 1.5348     | .8950      | .9669     | .5732     | 2.3693    |
| KURTOSIS (G2) | 1.2998     | -.8511     | -.2899    | -1.2272   | 5.0148    |
| STANDARD DEV. | .5863      | .8039      | .6816     | .8097     | .4475     |

| VARIABLE      | YN<br>V48 |
|---------------|-----------|
| MEAN          | .5581     |
| SKEWNESS (G1) | .8429     |
| KURTOSIS (G2) | -.5213    |
| STANDARD DEV. | .6963     |

MULTIVARIATE KURTOSIS

-----  
MARDIA'S COEFFICIENT (G2,P) = 14.8015  
NORMALIZED ESTIMATE = 7.0047

BONETT-WOODWARD-RANDALL TEST SHOWS SIGNIFICANT EXCESS KURTOSIS  
INDICATIVE OF NON-NORMALITY AT A ONE-TAIL .05 LEVEL.

ELLIPTICAL THEORY KURTOSIS ESTIMATES  
-----

MARDIA-BASED KAPPA = .3084 MEAN SCALED UNIVARIATE KURTOSIS = .1903  
MARDIA-BASED KAPPA IS USED IN COMPUTATION. KAPPA= .3084

CASE NUMBERS WITH LARGEST CONTRIBUTION TO NORMALIZED MULTIVARIATE KURTOSIS:  
-----

| CASE NUMBER | 6       | 15       | 26       | 34       | 43       |
|-------------|---------|----------|----------|----------|----------|
| ESTIMATE    | 93.5890 | 182.5853 | 135.7264 | 139.2267 | 270.4189 |

02-Aug-18            PAGE :   3   EQS            Licensee:  
TITLE:    Model built by EQS 6 for Windows

COVARIANCE MATRIX TO BE ANALYZED: 6 VARIABLES (SELECTED FROM 71 VARIABLES)  
BASED ON 86 CASES.

|     |     | PRP  | PRN  | SP   | SN   | YP   |
|-----|-----|------|------|------|------|------|
|     |     | V43  | V44  | V45  | V46  | V47  |
| PRP | V43 | .344 |      |      |      |      |
| PRN | V44 | .237 | .646 |      |      |      |
| SP  | V45 | .249 | .217 | .465 |      |      |
| SN  | V46 | .229 | .395 | .315 | .656 |      |
| YP  | V47 | .078 | .091 | .092 | .184 | .200 |
| YN  | V48 | .174 | .283 | .170 | .270 | .107 |
|     |     | YN   |      |      |      |      |
|     |     | V48  |      |      |      |      |
| YN  | V48 | .485 |      |      |      |      |

BENTLER-WEEKS STRUCTURAL REPRESENTATION:

NUMBER OF DEPENDENT VARIABLES = 6  
DEPENDENT V'S : 43 44 45 46 47 48

|                                   |    |    |    |    |    |    |
|-----------------------------------|----|----|----|----|----|----|
| NUMBER OF INDEPENDENT VARIABLES = | 8  |    |    |    |    |    |
| INDEPENDENT F'S :                 | 1  | 2  |    |    |    |    |
| INDEPENDENT E'S :                 | 43 | 44 | 45 | 46 | 47 | 48 |

NUMBER OF FREE PARAMETERS = 14  
NUMBER OF FIXED NONZERO PARAMETERS = 8

\*\*\* WARNING MESSAGES ABOVE, IF ANY, REFER TO THE MODEL PROVIDED.

CALCULATIONS FOR INDEPENDENCE MODEL NOW BEGIN.

```

*** WARNING MESSAGES ABOVE, IF ANY, REFER TO INDEPENDENCE MODEL.
    CALCULATIONS FOR USER'S MODEL NOW BEGIN.

```

```
3RD STAGE OF COMPUTATION REQUIRED      8625 WORDS OF MEMORY.
PROGRAM ALLOCATED    2000000 WORDS
```

DETERMINANT OF INPUT MATRIX IS .71446D-03

IN ITERATION # 1, MATRIX W\_CFUNCT MAY NOT BE POSITIVE DEFINITE.  
YOU HAVE BAD START VALUES TO BEGIN WITH.  
IF ABOVE MESSAGE APPEARS ON EVERY ITERATION, PLEASE PROVIDE BETTER START VALUES AND RE-RUN THE JOB.

PARAMETER ESTIMATES APPEAR IN ORDER,  
NO SPECIAL PROBLEMS WERE ENCOUNTERED DURING OPTIMIZATION.

RESIDUAL COVARIANCE MATRIX (S-SIGMA) :

|     |     | PRP<br>V43 | PRN<br>V44 | SP<br>V45 | SN<br>V46 | YP<br>V47 |
|-----|-----|------------|------------|-----------|-----------|-----------|
| PRP | V43 | .000       |            |           |           |           |
| PRN | V44 | .032       | .000       |           |           |           |
| SP  | V45 | .000       | -.027      | .000      |           |           |
| SN  | V46 | -.022      | .004       | .017      | .000      |           |
| YP  | V47 | .000       | -.045      | .000      | .018      | .000      |
| YN  | V48 | .020       | .043       | -.013     | -.024     | .005      |
|     |     | YN<br>V48  |            |           |           |           |
| YN  | V48 | .000       |            |           |           |           |



|                               |            |           |   |       |
|-------------------------------|------------|-----------|---|-------|
| AVERAGE ABSOLUTE              | COVARIANCE | RESIDUALS | = | .0129 |
| AVERAGE OFF-DIAGONAL ABSOLUTE | COVARIANCE | RESIDUALS | = | .0181 |

STANDARDIZED RESIDUAL MATRIX:

|     |     |       |       |       |       |      |
|-----|-----|-------|-------|-------|-------|------|
|     |     | PRP   | PRN   | SP    | SN    | YP   |
|     |     | V43   | V44   | V45   | V46   | V47  |
| PRP | V43 | .000  |       |       |       |      |
| PRN | V44 | .068  | .000  |       |       |      |
| SP  | V45 | .000  | -.049 | .000  |       |      |
| SN  | V46 | -.046 | .006  | .031  | .000  |      |
| YP  | V47 | .001  | -.125 | -.001 | .051  | .000 |
| YN  | V48 | .049  | .077  | -.028 | -.043 | .015 |

|    |     |      |
|----|-----|------|
|    |     | YN   |
|    |     | V48  |
| YN | V48 | .000 |

|                               |                        |   |       |
|-------------------------------|------------------------|---|-------|
| AVERAGE ABSOLUTE              | STANDARDIZED RESIDUALS | = | .0281 |
| AVERAGE OFF-DIAGONAL ABSOLUTE | STANDARDIZED RESIDUALS | = | .0394 |

LARGEST STANDARDIZED RESIDUALS:

| NO. | PARAMETER | ESTIMATE | NO. | PARAMETER | ESTIMATE |
|-----|-----------|----------|-----|-----------|----------|
| --- | -----     | -----    | --- | -----     | -----    |
| 1   | V47, V44  | -.125    | 11  | V48, V47  | .015     |
| 2   | V48, V44  | .077     | 12  | V46, V44  | .006     |
| 3   | V44, V43  | .068     | 13  | V47, V43  | .001     |
| 4   | V47, V46  | .051     | 14  | V47, V45  | -.001    |
| 5   | V48, V43  | .049     | 15  | V46, V46  | .000     |
| 6   | V45, V44  | -.049    | 16  | V48, V48  | .000     |
| 7   | V46, V43  | -.046    | 17  | V47, V47  | .000     |
| 8   | V48, V46  | -.043    | 18  | V45, V45  | .000     |
| 9   | V46, V45  | .031     | 19  | V45, V43  | .000     |
| 10  | V48, V45  | -.028    | 20  | V44, V44  | .000     |

DISTRIBUTION OF STANDARDIZED RESIDUALS

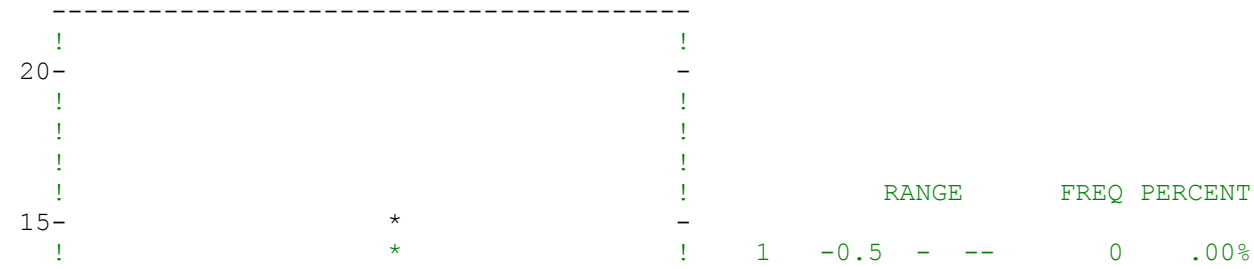

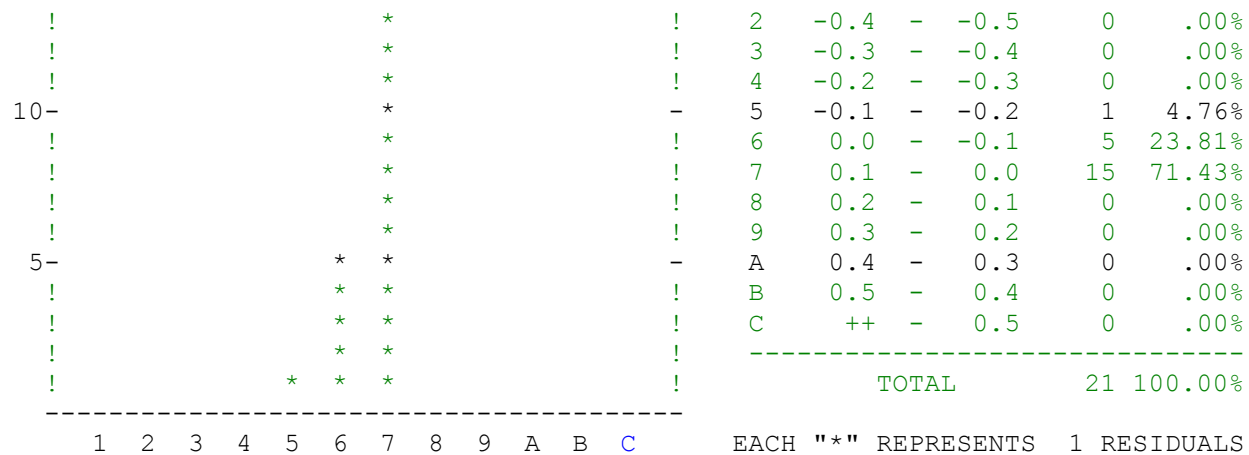

02-Aug-18      PAGE : 5   EQS      Licensee:  
TITLE:    Model built by EQS 6 for Windows

MAXIMUM LIKELIHOOD SOLUTION (NORMAL DISTRIBUTION THEORY)

GOODNESS OF FIT SUMMARY FOR METHOD = ML

INDEPENDENCE MODEL CHI-SQUARE                =        188.602 ON        15 DEGREES OF FREEDOM

INDEPENDENCE AIC =    158.60167    INDEPENDENCE CAIC =    106.78646  
                  MODEL AIC =        .66023                    MODEL CAIC =    -23.52020

CHI-SQUARE =            14.660 BASED ON            7 DEGREES OF FREEDOM  
PROBABILITY VALUE FOR THE CHI-SQUARE STATISTIC IS            .04061

THE NORMAL THEORY RLS CHI-SQUARE FOR THIS ML SOLUTION IS            14.070.

FIT INDICES

-----

BENTLER-BONETT        NORMED FIT INDEX =            .922  
BENTLER-BONETT NON-NORMED FIT INDEX =            .905  
COMPARATIVE FIT INDEX (CFI)                =            .956  
BOLLEN    (IFI) FIT INDEX                    =            .958  
MCDONALD (MFI) FIT INDEX                    =            .956  
LISREL    GFI    FIT INDEX                    =            .948  
LISREL    AGFI   FIT INDEX                    =            .843  
ROOT MEAN-SQUARE RESIDUAL (RMR)            =            .019  
STANDARDIZED RMR                            =            .043  
ROOT MEAN-SQUARE ERROR OF APPROXIMATION (RMSEA)        =            .113  
90% CONFIDENCE INTERVAL OF RMSEA    (            .022,            .194)

RELIABILITY COEFFICIENTS

-----

CRONBACH'S ALPHA = .826  
 COEFFICIENT ALPHA FOR AN OPTIMAL SHORT SCALE = .827  
 BASED ON 5 VARIABLES, ALL EXCEPT:  
 YP  
 RELIABILITY COEFFICIENT RHO = .810  
 GREATEST LOWER BOUND RELIABILITY = .903  
 GLB RELIABILITY FOR AN OPTIMAL SHORT SCALE = .903  
 BASED ON ALL VARIABLES  
 BENTLER'S DIMENSION-FREE LOWER BOUND RELIABILITY = .902  
 SHAPIRO'S LOWER BOUND RELIABILITY FOR A WEIGHTED COMPOSITE = .910  
 WEIGHTS THAT ACHIEVE SHAPIRO'S LOWER BOUND:  
 PRP PRN SP SN YP YN  
 .374 .476 .435 .541 .263 .289

GOODNESS OF FIT SUMMARY FOR METHOD = ROBUST

ROBUST INDEPENDENCE MODEL CHI-SQUARE = 138.134 ON 15 DEGREES OF FREEDOM

INDEPENDENCE AIC = 108.13366 INDEPENDENCE CAIC = 56.31845  
 MODEL AIC = -4.49022 MODEL CAIC = -28.67065

SATORRA-BENTLER SCALED CHI-SQUARE = 9.5098 ON 7 DEGREES OF FREEDOM  
 PROBABILITY VALUE FOR THE CHI-SQUARE STATISTIC IS .21810

RESIDUAL-BASED TEST STATISTIC = 8.259  
 PROBABILITY VALUE FOR THE CHI-SQUARE STATISTIC IS .31034

YUAN-BENTLER RESIDUAL-BASED TEST STATISTIC = 7.535  
 PROBABILITY VALUE FOR THE CHI-SQUARE STATISTIC IS .37537

YUAN-BENTLER RESIDUAL-BASED F-STATISTIC = 1.097  
 DEGREES OF FREEDOM = 7, 79  
 PROBABILITY VALUE FOR THE F-STATISTIC IS .37364

# FIT INDICES

-----

|                                                 |                      |       |       |
|-------------------------------------------------|----------------------|-------|-------|
| BENTLER-BONETT                                  | NORMED FIT INDEX     | =     | .931  |
| BENTLER-BONETT                                  | NON-NORMED FIT INDEX | =     | .956  |
| COMPARATIVE                                     | FIT INDEX (CFI)      | =     | .980  |
| BOLLEN                                          | (IFI) FIT INDEX      | =     | .981  |
| MCDONALD                                        | (MFI) FIT INDEX      | =     | .986  |
| ROOT MEAN-SQUARE ERROR OF APPROXIMATION (RMSEA) |                      | =     | .065  |
| 90% CONFIDENCE INTERVAL OF RMSEA                | (                    | .000, | .157) |

## ITERATIVE SUMMARY

| ITERATION | PARAMETER<br>ABS CHANGE | ALPHA   | FUNCTION |
|-----------|-------------------------|---------|----------|
| 1         | .183329                 | .50000  | 1.19757  |
| 2         | .252677                 | 1.00000 | .78416   |
| 3         | .089912                 | 1.00000 | .44955   |
| 4         | .139772                 | .50000  | .25848   |
| 5         | .043356                 | 1.00000 | .18037   |
| 6         | .019545                 | 1.00000 | .17383   |
| 7         | .006617                 | 1.00000 | .17273   |
| 8         | .003017                 | 1.00000 | .17252   |
| 9         | .001513                 | 1.00000 | .17248   |
| 10        | .000646                 | 1.00000 | .17247   |

02-Aug-18      PAGE : 6   EQS      Licensee:  
TITLE:    Model built by EQS 6 for Windows

MAXIMUM LIKELIHOOD SOLUTION (NORMAL DISTRIBUTION THEORY)

MEASUREMENT EQUATIONS WITH STANDARD ERRORS AND TEST STATISTICS  
STATISTICS SIGNIFICANT AT THE 5% LEVEL ARE MARKED WITH @.  
(ROBUST STATISTICS IN PARENTHESES)

PRP    =V43 =   1.000 F1      +1.000 E43

PRN    =V44 =   1.000 F2      +1.000 E44

SP      =V45 =   1.190\*F1      +1.000 E45  
                 .199  
                 5.981@  
                 ( .214)  
                 ( 5.569@

SN      =V46 =   1.224\*F2      +1.000 E46  
                 .190  
                 6.449@  
                 ( .181)  
                 ( 6.747@

YP      =V47 =    .662\*F1      +1.000 E47  
                 .166  
                 3.992@  
                 ( .218)  
                 ( 3.034@

YN      =V48 =    .753\*F2      +1.000 E48  
                 .149  
                 5.036@  
                 ( .146)  
                 ( 5.164@



02-Aug-18      PAGE : 7   EQS      Licensee:  
TITLE:    Model built by EQS 6 for Windows

MAXIMUM LIKELIHOOD SOLUTION (NORMAL DISTRIBUTION THEORY)

VARIANCES OF INDEPENDENT VARIABLES

-----  
STATISTICS SIGNIFICANT AT THE 5% LEVEL ARE MARKED WITH @.

| V         | F         |
|-----------|-----------|
| ---       | ---       |
| I F1 - F1 | .117*I    |
| I         | .048 I    |
| I         | 2.441@I   |
| I         | ( .046)I  |
| I         | ( 2.523@I |
| I         | I         |
| I F2 - F2 | .319*I    |
| I         | .093 I    |
| I         | 3.444@I   |
| I         | ( .081)I  |
| I         | ( 3.941@I |
| I         | I         |

02-Aug-18      PAGE : 8   EQS      Licensee:  
TITLE:    Model built by EQS 6 for Windows

MAXIMUM LIKELIHOOD SOLUTION (NORMAL DISTRIBUTION THEORY)

VARIANCES OF INDEPENDENT VARIABLES

-----  
STATISTICS SIGNIFICANT AT THE 5% LEVEL ARE MARKED WITH @.

|           | E         | D   |   |
|-----------|-----------|-----|---|
|           | ---       | --- |   |
| E43 - PRP | .227*I    |     | I |
|           | .044 I    |     | I |
|           | 5.148@I   |     | I |
|           | ( .059)I  |     | I |
|           | ( 3.812@I |     | I |
|           | I         |     | I |
| E44 - PRN | .327*I    |     | I |
|           | .062 I    |     | I |
|           | 5.304@I   |     | I |
|           | ( .069)I  |     | I |
|           | ( 4.711@I |     | I |
|           | I         |     | I |
| E45 - SP  | .299*I    |     | I |
|           | .060 I    |     | I |
|           | 5.016@I   |     | I |
|           | ( .070)I  |     | I |
|           | ( 4.287@I |     | I |
|           | I         |     | I |
| E46 - SN  | .178*I    |     | I |
|           | .055 I    |     | I |
|           | 3.207@I   |     | I |
|           | ( .069)I  |     | I |
|           | ( 2.590@I |     | I |
|           | I         |     | I |

E47 - YP

.149\*I  
.026 I  
5.823@I  
( .038)I  
( 3.901@I

I  
I  
I  
I  
I

E48 - YN

.304\*I  
.052 I  
5.804@I  
( .055)I  
( 5.549@I  
I

I  
I  
I  
I  
I  
I

02-Aug-18      PAGE : 9   EQS      Licensee:  
TITLE:    Model built by EQS 6 for Windows

MAXIMUM LIKELIHOOD SOLUTION (NORMAL DISTRIBUTION THEORY)

COVARIANCES AMONG INDEPENDENT VARIABLES

-----  
STATISTICS SIGNIFICANT AT THE 5% LEVEL ARE MARKED WITH @.

| V         | F         |
|-----------|-----------|
| ---       | ---       |
| I F2 - F2 | .205*I    |
| I F1 - F1 | .051 I    |
| I         | 3.988@I   |
| I         | ( .053) I |
| I         | ( 3.883@I |
| I         | I         |

02-Aug-18      PAGE : 10   EQS      Licensee:  
TITLE:    Model built by EQS 6 for Windows

MAXIMUM LIKELIHOOD SOLUTION (NORMAL DISTRIBUTION THEORY)

COVARIANCES AMONG INDEPENDENT VARIABLES

-----  
STATISTICS SIGNIFICANT AT THE 5% LEVEL ARE MARKED WITH @.

|           | E         | D   |   |
|-----------|-----------|-----|---|
|           | ---       | --- |   |
| E45 - SP  | .110*I    |     | I |
| E43 - PRP | .044 I    |     | I |
|           | 2.503@I   |     | I |
|           | ( .053)I  |     | I |
|           | ( 2.084@I |     | I |
|           | I         |     | I |

02-Aug-18      PAGE : 11   EQS      Licensee:  
TITLE:    Model built by EQS 6 for Windows

MAXIMUM LIKELIHOOD SOLUTION (NORMAL DISTRIBUTION THEORY)

STANDARDIZED SOLUTION:

R-SQUARED

|     |        |         |   |          |      |
|-----|--------|---------|---|----------|------|
| PRP | =V43 = | .584 F1 | + | .812 E43 | .341 |
| PRN | =V44 = | .703 F2 | + | .711 E44 | .494 |
| SP  | =V45 = | .598*F1 | + | .802 E45 | .357 |
| SN  | =V46 = | .854*F2 | + | .520 E46 | .729 |
| YP  | =V47 = | .506*F1 | + | .863 E47 | .256 |
| YN  | =V48 = | .611*F2 | + | .792 E48 | .373 |

02-Aug-18      PAGE : 12   EQS      Licensee:  
TITLE:    Model built by EQS 6 for Windows

MAXIMUM LIKELIHOOD SOLUTION (NORMAL DISTRIBUTION THEORY)

CORRELATIONS AMONG INDEPENDENT VARIABLES

-----

| V         |         | F   |
|-----------|---------|-----|
| ---       |         | --- |
| I F2 - F2 | 1.059*I |     |
| I F1 - F1 | I       |     |
| I         | I       |     |

02-Aug-18      PAGE : 13   EQS      Licensee:  
TITLE:    Model built by EQS 6 for Windows

MAXIMUM LIKELIHOOD SOLUTION (NORMAL DISTRIBUTION THEORY)

CORRELATIONS AMONG INDEPENDENT VARIABLES

|           | E   |        | D   |   |
|-----------|-----|--------|-----|---|
|           | --- |        | --- |   |
| E45 - SP  |     | .421*I |     | I |
| E43 - PRP |     | I      |     | I |
|           |     | I      |     | I |

-----  
E N D      O F      M E T H O D  
-----



02-Aug-18            PAGE : 14   EQS        Licensee:  
TITLE:    Model built by EQS 6 for Windows

MAXIMUM LIKELIHOOD SOLUTION (NORMAL DISTRIBUTION THEORY)

WALD TEST (FOR DROPPING PARAMETERS)  
ROBUST INFORMATION MATRIX USED IN THIS WALD TEST  
MULTIVARIATE WALD TEST BY SIMULTANEOUS PROCESS

| CUMULATIVE MULTIVARIATE STATISTICS |           |            |      |             | UNIVARIATE INCREMENT |             |
|------------------------------------|-----------|------------|------|-------------|----------------------|-------------|
| -----                              |           |            |      |             | -----                |             |
| STEP                               | PARAMETER | CHI-SQUARE | D.F. | PROBABILITY | CHI-SQUARE           | PROBABILITY |
| ----                               | -----     | -----      | ---- | -----       | -----                | -----       |

\*\*\*\*\*

NONE OF THE FREE PARAMETERS IS DROPPED IN THIS PROCESS.

02-Aug-18      PAGE : 15   EQS      Licensee:  
TITLE:    Model built by EQS 6 for Windows

MAXIMUM LIKELIHOOD SOLUTION (NORMAL DISTRIBUTION THEORY)

LAGRANGE MULTIPLIER TEST (FOR ADDING PARAMETERS)

ORDERED UNIVARIATE TEST STATISTICS:

| NO | CODE | PARAMETER | CHI-<br>SQUARE | PROB. | HANCOCK<br>7 DF<br>PROB. | PARAMETER<br>CHANGE | STANDAR-<br>DIZED<br>CHANGE |
|----|------|-----------|----------------|-------|--------------------------|---------------------|-----------------------------|
| -- | ---- | -----     | -----          | ----- | -----                    | -----               | -----                       |
| 1  | 2 12 | V44,F1    | 3.191          | .074  | .867                     | 4.183               | 15.206                      |
| 2  | 2 12 | V46,F1    | 2.511          | .113  | .926                     | -5.012              | -18.089                     |
| 3  | 2 12 | V48,F1    | .131           | .717  | 1.000                    | -.659               | -2.768                      |
| 4  | 2 12 | V45,F2    | .001           | .979  | 1.000                    | -.047               | -.121                       |
| 5  | 2 12 | V43,F2    | .001           | .979  | 1.000                    | .039                | .118                        |
| 6  | 2 12 | V47,F2    | .000           | 1.000 | 1.000                    | .000                | .000                        |
| 7  | 2 0  | V43,F1    | .000           | 1.000 | 1.000                    | .000                | .000                        |
| 8  | 2 0  | V44,F2    | .000           | 1.000 | 1.000                    | .000                | .000                        |

\*\*\*\*\* NONE OF THE UNIVARIATE LAGRANGE MULTIPLIERS IS SIGNIFICANT,  
\*\*\*\*\* THE MULTIVARIATE TEST PROCEDURE WILL NOT BE EXECUTED.

LAGRANGIAN MULTIPLIER TEST REQUIRED      3363 WORDS OF MEMORY.  
PROGRAM ALLOCATES 2000000 WORDS.

1

Execution begins at 02:52:21  
Execution ends    at 02:52:21  
Elapsed time =        .00 seconds

02-Aug-18      PAGE : 12   EQS      Licensee:  
TITLE:    Model built by EQS 6 for Windows

MAXIMUM LIKELIHOOD SOLUTION (NORMAL DISTRIBUTION THEORY)

WALD TEST (FOR DROPPING PARAMETERS)

ROBUST INFORMATION MATRIX USED IN THIS WALD TEST

MULTIVARIATE WALD TEST BY SIMULTANEOUS PROCESS

| CUMULATIVE MULTIVARIATE STATISTICS |           |            |      |             | UNIVARIATE INCREMENT |             |
|------------------------------------|-----------|------------|------|-------------|----------------------|-------------|
| -----                              |           |            |      |             | -----                |             |
| STEP                               | PARAMETER | CHI-SQUARE | D.F. | PROBABILITY | CHI-SQUARE           | PROBABILITY |
| ----                               | -----     | -----      | ---- | -----       | -----                | -----       |

\*\*\*\*\*

NONE OF THE FREE PARAMETERS IS DROPPED IN THIS PROCESS.

02-Aug-18      PAGE : 13   EQS      Licensee:  
TITLE:    Model built by EQS 6 for Windows

MAXIMUM LIKELIHOOD SOLUTION (NORMAL DISTRIBUTION THEORY)

LAGRANGE MULTIPLIER TEST (FOR ADDING PARAMETERS)

ORDERED UNIVARIATE TEST STATISTICS:

| NO | CODE   | PARAMETER | CHI-<br>SQUARE | PROB. | HANCOCK<br>8 DF<br>PROB. | PARAMETER<br>CHANGE | STANDAR-<br>DIZED<br>CHANGE |
|----|--------|-----------|----------------|-------|--------------------------|---------------------|-----------------------------|
| -- | -----  | -----     | -----          | ----- | -----                    | -----               | -----                       |
| 1  | 2    0 | V43,F1    | .000           | 1.000 | .000                     | .000                | .000                        |

\*\*\*\*\* NONE OF THE UNIVARIATE LAGRANGE MULTIPLIERS IS SIGNIFICANT,  
\*\*\*\*\* THE MULTIVARIATE TEST PROCEDURE WILL NOT BE EXECUTED.

LAGRANGIAN MULTIPLIER TEST REQUIRED      2740 WORDS OF MEMORY.  
PROGRAM ALLOCATES 2000000 WORDS.

1

Execution begins at 02:47:35  
Execution ends    at 02:47:35  
Elapsed time =      .00 seconds

Exact age (in years) effects on latent factor and its indicators (non-significant)

EQS, A STRUCTURAL EQUATION PROGRAM  
COPYRIGHT BY P.M. BENTLER

MULTIVARIATE SOFTWARE, INC.  
VERSION 6.1 (C) 1985 - 2005 (B85).

PROGRAM CONTROL INFORMATION

```
1  /TITLE
2  Model built by EQS 6 for Windows
3  /SPECIFICATIONS
4  DATA='c:\users\user\desktop\berlinverbs-natsopoulos new_1.ess';
5  VARIABLES=71; CASES=94;
6  METHOD=ML,ROBUST; ANALYSIS=COVARIANCE; MATRIX=RAW;
7  /LABELS
8  V1=CODE; V2=GENDER; V3=AGECAT; V4=AGE; V5=EDUC;
9  V6=XARA; V7=EKPLIXI; V8=OUDETERO; V9=LIPIMENO; V10=THUMOS;
10 V11=AGXOS; V12=AIDIA; V13=CORRECT; V14=RANGE; V15=PR1P;
11 V16=GN1N; V17=S1P; V18=L1N; V19=Y1N; V20=TH1P;
12 V21=P1N; V22=PR2N; V23=L2P; V24=Y2P; V25=TH2N;
13 V26=P2P; V27=S2N; V28=GN2N; V29=PR3P; V30=L3N;
14 V31=Y3N; V32=TH3N; V33=P3N; V34=S3P; V35=GN3P;
15 V36=PR4N; V37=L4P; V38=Y4P; V39=TH4P; V40=P4P;
16 V41=GN4P; V42=S4N; V43=PRP; V44=PRN; V45=SP;
17 V46=SN; V47=YP; V48=YN; V49=PP; V50=PN;
18 V51=PROTOTAL; V52=SYMFVNVT; V53=YPOSXOMA; V54=PISTEYVT; V55=SYNOLOPR;
19 V56=SYNOLOSY; V57=SYNOLOYP; V58=SYNOLOPI; V59=TASITDEC; V60=TOTALPOS;
20 V61=TOTALNEG; V62=FACTIVEP; V63=FACTIVEN; V64=TOTALNON; V65=TOTALFAC;
21 V66=GNORIZOP; V67=GNORIZON; V68=LISMOMOP; V69=LISMOMON; V70=THYMAMAI;
22 V71=V71_A;
23 /EQUATIONS
24 V43 = 1F1 + E43;
25 V44 = *F1 + E44;
26 V45 = *F1 + E45;
27 V46 = *F1 + E46;
28 V47 = *F1 + E47;
29 V48 = *F1 + E48;
```

```

30 F1 = *V4 + D1;
31 /VARIANCES
32 V4 = *;
33 E43 = *;
34 E44 = *;
35 E45 = *;
36 E46 = *;
37 E47 = *;
38 E48 = *;
39 D1 = *;
40 /COVARIANCES
41 E45,E43 = *;
42 /PRINT
43 FIT=ALL;
44 TABLE=EQUATION;
45 /LMTEST
46 PROCESS=SIMULTANEOUS;
47 SET=PVV, PFV, PFF, PDD, GVV, GVF, GFV, GFF,
48 BVF, BFF;
49 /WTEST
50 PVAL=0.05;
51 PRIORITY=ZERO;
52 /END

```

52 RECORDS OF INPUT MODEL FILE WERE READ

DATA IS READ FROM c:\users\user\desktop\berlinverbs-natsopoulos new\_1.ess  
THERE ARE 71 VARIABLES AND 94 CASES  
IT IS A RAW DATA ESS FILE

02-Aug-18      PAGE : 2   EQS      Licensee:  
TITLE:    Model built by EQS 6 for Windows

SAMPLE STATISTICS BASED ON COMPLETE CASES

UNIVARIATE STATISTICS

| VARIABLE      | AGE<br>V4 | PRP<br>V43 | PRN<br>V44 | SP<br>V45 | SN<br>V46 |
|---------------|-----------|------------|------------|-----------|-----------|
| MEAN          | 52.1170   | .3191      | .5957      | .5106     | .7234     |
| SKEWNESS (G1) | -.1104    | 1.6068     | .8491      | .9757     | .5475     |
| KURTOSIS (G2) | -1.3954   | 1.5617     | -.8791     | -.2855    | -1.2911   |
| STANDARD DEV. | 23.1074   | .5720      | .7941      | .6838     | .8218     |

| VARIABLE      | YP<br>V47 | YN<br>V48 |
|---------------|-----------|-----------|
| MEAN          | .2021     | .5319     |
| SKEWNESS (G1) | 2.3302    | .9016     |
| KURTOSIS (G2) | 4.7141    | -.3947    |
| STANDARD DEV. | .4770     | .6832     |

MULTIVARIATE KURTOSIS

-----  
MARDIA'S COEFFICIENT (G2,P) = 12.2627  
NORMALIZED ESTIMATE = 5.2958

BONETT-WOODWARD-RANDALL TEST SHOWS SIGNIFICANT EXCESS KURTOSIS  
INDICATIVE OF NON-NORMALITY AT A ONE-TAIL .05 LEVEL.

ELLIPTICAL THEORY KURTOSIS ESTIMATES  
-----

MARDIA-BASED KAPPA = .1946 MEAN SCALED UNIVARIATE KURTOSIS = .0967  
MARDIA-BASED KAPPA IS USED IN COMPUTATION. KAPPA= .1946

CASE NUMBERS WITH LARGEST CONTRIBUTION TO NORMALIZED MULTIVARIATE KURTOSIS:  
-----

| CASE NUMBER | 15       | 26       | 34       | 43       | 70       |
|-------------|----------|----------|----------|----------|----------|
| ESTIMATE    | 159.0846 | 135.5504 | 137.6989 | 187.2339 | 177.5028 |



02-Aug-18      PAGE : 3   EQS      Licensee:  
 TITLE:    Model built by EQS 6 for Windows

COVARIANCE   MATRIX TO BE ANALYZED:    7 VARIABLES (SELECTED FROM 71 VARIABLES)  
 BASED ON      94 CASES.

|     |     | AGE<br>V4 | PRP<br>V43 | PRN<br>V44 | SP<br>V45 | SN<br>V46 |
|-----|-----|-----------|------------|------------|-----------|-----------|
| AGE | V4  | 533.954   |            |            |           |           |
| PRP | V43 | -3.339    | .327       |            |           |           |
| PRN | V44 | -.802     | .216       | .631       |           |           |
| SP  | V45 | -2.512    | .233       | .219       | .468      |           |
| SN  | V46 | -.365     | .218       | .403       | .315      | .675      |
| YP  | V47 | -.497     | .075       | .093       | .078      | .207      |
| YN  | V48 | -3.310    | .173       | .271       | .177      | .267      |

  

|    |     | YP<br>V47 | YN<br>V48 |
|----|-----|-----------|-----------|
| YP | V47 | .228      |           |
| YN | V48 | .096      | .467      |

BENTLER-WEEKS STRUCTURAL REPRESENTATION:

NUMBER OF DEPENDENT VARIABLES = 7  
 DEPENDENT V'S :    43   44   45   46   47   48  
 DEPENDENT F'S :      1

NUMBER OF INDEPENDENT VARIABLES = 8  
 INDEPENDENT V'S :      4  
 INDEPENDENT E'S :    43   44   45   46   47   48  
 INDEPENDENT D'S :      1

NUMBER OF FREE PARAMETERS = 15  
NUMBER OF FIXED NONZERO PARAMETERS = 8

\*\*\* WARNING MESSAGES ABOVE, IF ANY, REFER TO THE MODEL PROVIDED.  
CALCULATIONS FOR INDEPENDENCE MODEL NOW BEGIN.

\*\*\* WARNING MESSAGES ABOVE, IF ANY, REFER TO INDEPENDENCE MODEL.  
CALCULATIONS FOR USER'S MODEL NOW BEGIN.

3RD STAGE OF COMPUTATION REQUIRED 13253 WORDS OF MEMORY.  
PROGRAM ALLOCATED 2000000 WORDS

DETERMINANT OF INPUT MATRIX IS .37099D+00

PARAMETER ESTIMATES APPEAR IN ORDER,  
NO SPECIAL PROBLEMS WERE ENCOUNTERED DURING OPTIMIZATION.

RESIDUAL COVARIANCE MATRIX (S-SIGMA) :

|     |     | AGE<br>V4 | PRP<br>V43 | PRN<br>V44 | SP<br>V45 | SN<br>V46 |
|-----|-----|-----------|------------|------------|-----------|-----------|
| AGE | V4  | .000      |            |            |           |           |
| PRP | V43 | -2.457    | .000       |            |           |           |
| PRN | V44 | .668      | .025       | .000       |           |           |
| SP  | V45 | -1.412    | .000       | -.019      | .000      |           |
| SN  | V46 | 1.481     | -.022      | .003       | .015      | .000      |
| YP  | V47 | .145      | -.009      | -.046      | -.026     | .032      |
| YN  | V48 | -2.233    | .032       | .037       | .002      | -.027     |
|     |     |           |            |            |           |           |
|     |     | YP<br>V47 | YN<br>V48  |            |           |           |

|    |     |       |      |
|----|-----|-------|------|
| YP | V47 | .000  |      |
| YN | V48 | -.006 | .000 |

|                               |            |           |   |       |
|-------------------------------|------------|-----------|---|-------|
| AVERAGE ABSOLUTE              | COVARIANCE | RESIDUALS | = | .3106 |
| AVERAGE OFF-DIAGONAL ABSOLUTE | COVARIANCE | RESIDUALS | = | .4142 |

STANDARDIZED RESIDUAL MATRIX:

|     |     |       |       |       |       |       |
|-----|-----|-------|-------|-------|-------|-------|
|     |     | AGE   | PRP   | PRN   | SP    | SN    |
|     |     | V4    | V43   | V44   | V45   | V46   |
| AGE | V4  | .000  |       |       |       |       |
| PRP | V43 | -.186 | .000  |       |       |       |
| PRN | V44 | .036  | .055  | .000  |       |       |
| SP  | V45 | -.089 | .000  | -.035 | .000  |       |
| SN  | V46 | .078  | -.047 | .004  | .027  | .000  |
| YP  | V47 | .013  | -.033 | -.121 | -.079 | .082  |
| YN  | V48 | -.141 | .083  | .069  | .005  | -.047 |

|    |     |       |      |
|----|-----|-------|------|
|    |     | YP    | YN   |
|    |     | V47   | V48  |
| YP | V47 | .000  |      |
| YN | V48 | -.020 | .000 |

|                               |                        |   |       |
|-------------------------------|------------------------|---|-------|
| AVERAGE ABSOLUTE              | STANDARDIZED RESIDUALS | = | .0447 |
| AVERAGE OFF-DIAGONAL ABSOLUTE | STANDARDIZED RESIDUALS | = | .0596 |

02-Aug-18            PAGE :    4   EQS            Licensee:  
TITLE:    Model built by EQS 6 for Windows

MAXIMUM LIKELIHOOD SOLUTION (NORMAL DISTRIBUTION THEORY)

LARGEST STANDARDIZED RESIDUALS:

| NO. | PARAMETER | ESTIMATE | NO. | PARAMETER | ESTIMATE |
|-----|-----------|----------|-----|-----------|----------|
| 1   | V43, V4   | -.186    | 11  | V48, V46  | -.047    |
| 2   | V48, V4   | -.141    | 12  | V46, V43  | -.047    |
| 3   | V47, V44  | -.121    | 13  | V44, V4   | .036     |
| 4   | V45, V4   | -.089    | 14  | V45, V44  | -.035    |
| 5   | V48, V43  | .083     | 15  | V47, V43  | -.033    |
| 6   | V47, V46  | .082     | 16  | V46, V45  | .027     |
| 7   | V47, V45  | -.079    | 17  | V48, V47  | -.020    |
| 8   | V46, V4   | .078     | 18  | V47, V4   | .013     |
| 9   | V48, V44  | .069     | 19  | V48, V45  | .005     |
| 10  | V44, V43  | .055     | 20  | V46, V44  | .004     |

## DISTRIBUTION OF STANDARDIZED RESIDUALS

|   | RANGE     | FREQ | PERCENT |
|---|-----------|------|---------|
| 1 | -0.5 - -- | 0    | .00%    |

|       |   |   |   |   |   |   |   |   |   |   |       |      |                                 |      |    |         |
|-------|---|---|---|---|---|---|---|---|---|---|-------|------|---------------------------------|------|----|---------|
| !     |   |   |   |   |   | * |   |   |   | ! | 2     | -0.4 | -                               | -0.5 | 0  | .00%    |
| !     |   |   |   |   |   | * |   |   |   | ! | 3     | -0.3 | -                               | -0.4 | 0  | .00%    |
| !     |   |   |   |   |   | * |   |   |   | ! | 4     | -0.2 | -                               | -0.3 | 0  | .00%    |
| 10-   |   |   |   |   |   | * |   |   |   | - | 5     | -0.1 | -                               | -0.2 | 3  | 10.71%  |
| !     |   |   |   |   | * | * |   |   |   | ! | 6     | 0.0  | -                               | -0.1 | 9  | 32.14%  |
| !     |   |   |   |   | * | * |   |   |   | ! | 7     | 0.1  | -                               | 0.0  | 16 | 57.14%  |
| !     |   |   |   |   | * | * |   |   |   | ! | 8     | 0.2  | -                               | 0.1  | 0  | .00%    |
| !     |   |   |   |   | * | * |   |   |   | ! | 9     | 0.3  | -                               | 0.2  | 0  | .00%    |
| 5-    |   |   |   |   | * | * |   |   |   | - | A     | 0.4  | -                               | 0.3  | 0  | .00%    |
| !     |   |   |   |   | * | * |   |   |   | ! | B     | 0.5  | -                               | 0.4  | 0  | .00%    |
| !     |   |   |   | * | * | * |   |   |   | ! | C     | ++   | -                               | 0.5  | 0  | .00%    |
| !     |   |   |   | * | * | * |   |   |   | ! | ----- |      |                                 |      |    |         |
|       |   |   |   |   |   |   |   |   |   |   | TOTAL |      |                                 |      | 28 | 100.00% |
| ----- |   |   |   |   |   |   |   |   |   |   |       |      |                                 |      |    |         |
|       | 1 | 2 | 3 | 4 | 5 | 6 | 7 | 8 | 9 | A | B     | C    | EACH "*" REPRESENTS 1 RESIDUALS |      |    |         |

02-Aug-18      PAGE : 5   EQS      Licensee:  
TITLE:    Model built by EQS 6 for Windows

MAXIMUM LIKELIHOOD SOLUTION (NORMAL DISTRIBUTION THEORY)

GOODNESS OF FIT SUMMARY FOR METHOD = ML

INDEPENDENCE MODEL CHI-SQUARE            =        213.736 ON        21 DEGREES OF FREEDOM

INDEPENDENCE AIC =    171.73565    INDEPENDENCE CAIC =    97.32646  
                  MODEL AIC =       2.14915                    MODEL CAIC =    -43.91368

CHI-SQUARE =            28.149 BASED ON            13 DEGREES OF FREEDOM  
PROBABILITY VALUE FOR THE CHI-SQUARE STATISTIC IS            .00863

THE NORMAL THEORY RLS CHI-SQUARE FOR THIS ML SOLUTION IS            27.959.

FIT INDICES

-----

BENTLER-BONETT        NORMED FIT INDEX =            .868  
BENTLER-BONETT NON-NORMED FIT INDEX =            .873  
COMPARATIVE FIT INDEX (CFI)            =            .921  
BOLLEN    (IFI) FIT INDEX               =            .925  
MCDONALD (MFI) FIT INDEX               =            .923  
LISREL    GFI    FIT INDEX               =            .921  
LISREL    AGFI   FIT INDEX               =            .830  
ROOT MEAN-SQUARE RESIDUAL (RMR)       =            .748  
STANDARDIZED RMR                        =            .066  
ROOT MEAN-SQUARE ERROR OF APPROXIMATION (RMSEA)       =            .112  
90% CONFIDENCE INTERVAL OF RMSEA    (            .054,            .168)

RELIABILITY COEFFICIENTS

-----

CRONBACH'S ALPHA = -.035  
 COEFFICIENT ALPHA FOR AN OPTIMAL SHORT SCALE = .825  
 BASED ON 5 VARIABLES, ALL EXCEPT:  
     SN            YN  
 GREATEST LOWER BOUND RELIABILITY = .087  
 GLB RELIABILITY FOR AN OPTIMAL SHORT SCALE = .902  
 BASED ON 6 VARIABLES, ALL EXCEPT:  
     YN  
 BENTLER'S DIMENSION-FREE LOWER BOUND RELIABILITY = .008  
 SHAPIRO'S LOWER BOUND RELIABILITY FOR A WEIGHTED COMPOSITE = .310  
 WEIGHTS THAT ACHIEVE SHAPIRO'S LOWER BOUND:  
     AGE          PRP          PRN          SP          SN          YP  
     -.164        .360        .424        .406        .550        .266  
     YN  
     .354

GOODNESS OF FIT SUMMARY FOR METHOD = ROBUST

ROBUST INDEPENDENCE MODEL CHI-SQUARE = 172.548 ON 21 DEGREES OF FREEDOM  
  
 INDEPENDENCE AIC = 130.54817 INDEPENDENCE CAIC = 56.13898  
     MODEL AIC = -5.32517 MODEL CAIC = -51.38800  
  
 SATORRA-BENTLER SCALED CHI-SQUARE = 20.6748 ON 13 DEGREES OF FREEDOM  
 PROBABILITY VALUE FOR THE CHI-SQUARE STATISTIC IS .07961  
  
 RESIDUAL-BASED TEST STATISTIC = 18.365  
 PROBABILITY VALUE FOR THE CHI-SQUARE STATISTIC IS .14413  
  
 YUAN-BENTLER RESIDUAL-BASED TEST STATISTIC = 15.364  
 PROBABILITY VALUE FOR THE CHI-SQUARE STATISTIC IS .28520  
  
 YUAN-BENTLER RESIDUAL-BASED F-STATISTIC = 1.230  
 DEGREES OF FREEDOM = 13, 81

PROBABILITY VALUE FOR THE F-STATISTIC IS .27373

FIT INDICES

-----  
BENTLER-BONETT NORMED FIT INDEX = .880  
BENTLER-BONETT NON-NORMED FIT INDEX = .918  
COMPARATIVE FIT INDEX (CFI) = .949  
BOLLEN (IFI) FIT INDEX = .952  
MCDONALD (MFI) FIT INDEX = .960  
ROOT MEAN-SQUARE ERROR OF APPROXIMATION (RMSEA) = .080  
90% CONFIDENCE INTERVAL OF RMSEA ( .000, .141)

ITERATIVE SUMMARY

| ITERATION | PARAMETER<br>ABS CHANGE | ALPHA   | FUNCTION |
|-----------|-------------------------|---------|----------|
| 1         | 35.992760               | 1.00000 | 17.96269 |
| 2         | 35.977040               | 1.00000 | .96076   |
| 3         | .153297                 | 1.00000 | .40547   |
| 4         | .044869                 | 1.00000 | .31245   |
| 5         | .020398                 | 1.00000 | .30488   |
| 6         | .008858                 | 1.00000 | .30326   |
| 7         | .005284                 | 1.00000 | .30283   |
| 8         | .002511                 | 1.00000 | .30272   |
| 9         | .001446                 | 1.00000 | .30269   |
| 10        | .000710                 | 1.00000 | .30268   |



02-Aug-18      PAGE : 6   EQS      Licensee:  
TITLE:    Model built by EQS 6 for Windows

MAXIMUM LIKELIHOOD SOLUTION (NORMAL DISTRIBUTION THEORY)

MEASUREMENT EQUATIONS WITH STANDARD ERRORS AND TEST STATISTICS  
STATISTICS SIGNIFICANT AT THE 5% LEVEL ARE MARKED WITH @.  
(ROBUST STATISTICS IN PARENTHESES)

PRP    =V43 =      1.000 F1      +   1.000 E43

PRN    =V44 =      1.666\*F1      +   1.000 E44  
                 .324  
                 5.139@  
                 (    .334)  
                 (   4.990@

SP     =V45 =      1.247\*F1      +   1.000 E45  
                 .211  
                 5.907@  
                 (    .236)  
                 (   5.277@

SN     =V46 =      2.093\*F1      +   1.000 E46  
                 .377  
                 5.558@  
                 (    .411)  
                 (   5.089@

$$\begin{aligned}
 YP \quad =V47 = & \quad .728*F1 \quad + \quad 1.000 \text{ E}47 \\
 & \quad .178 \\
 & \quad 4.087@ \\
 & \quad ( \quad .228) \\
 & \quad ( \quad 3.190@
 \end{aligned}$$

$$\begin{aligned}
 YN \quad =V48 = & \quad 1.222*F1 \quad + \quad 1.000 \text{ E}48 \\
 & \quad .265 \\
 & \quad 4.609@ \\
 & \quad ( \quad .276) \\
 & \quad ( \quad 4.423@
 \end{aligned}$$

02-Aug-18      PAGE : 7   EQS      Licensee:  
TITLE:    Model built by EQS 6 for Windows

MAXIMUM LIKELIHOOD SOLUTION (NORMAL DISTRIBUTION THEORY)

CONSTRUCT EQUATIONS WITH STANDARD ERRORS AND TEST STATISTICS  
STATISTICS SIGNIFICANT AT THE 5% LEVEL ARE MARKED WITH @.  
(ROBUST STATISTICS IN PARENTHESES)

|    |     |   |          |   |          |
|----|-----|---|----------|---|----------|
| F1 | =F1 | = | -.002*V4 | + | 1.000 D1 |
|    |     |   | .002     |   |          |
|    |     |   | -.997    |   |          |
|    |     | ( | .002)    |   |          |
|    |     | ( | -.911)   |   |          |

02-Aug-18      PAGE : 8   EQS      Licensee:  
TITLE:    Model built by EQS 6 for Windows

MAXIMUM LIKELIHOOD SOLUTION (NORMAL DISTRIBUTION THEORY)

VARIANCES OF INDEPENDENT VARIABLES

-----  
STATISTICS SIGNIFICANT AT THE 5% LEVEL ARE MARKED WITH @.

|          | V          | F   |   |
|----------|------------|-----|---|
|          | ---        | --- |   |
| V4 - AGE | 533.954*I  |     | I |
|          | 78.303 I   |     | I |
|          | 6.819@I    |     | I |
|          | ( 42.594)I |     | I |
|          | ( 12.536@I |     | I |
|          | I          |     | I |

02-Aug-18      PAGE : 9   EQS      Licensee:  
 TITLE:    Model built by EQS 6 for Windows

MAXIMUM LIKELIHOOD SOLUTION (NORMAL DISTRIBUTION THEORY)

VARIANCES OF INDEPENDENT VARIABLES

-----  
 STATISTICS SIGNIFICANT AT THE 5% LEVEL ARE MARKED WITH @.

|           | E<br>---  |         | D<br>---  |
|-----------|-----------|---------|-----------|
| E43 - PRP | .212*I    | D1 - F1 | .113*I    |
|           | .035 I    |         | .039 I    |
|           | 6.096@I   |         | 2.891@I   |
|           | ( .042)I  |         | ( .042)I  |
|           | ( 5.045@I |         | ( 2.720@I |
|           | I         |         | I         |
| E44 - PRN | .312*I    |         | I         |
|           | .057 I    |         | I         |
|           | 5.465@I   |         | I         |
|           | ( .063)I  |         | I         |
|           | ( 4.941@I |         | I         |
|           | I         |         | I         |
| E45 - SP  | .289*I    |         | I         |
|           | .048 I    |         | I         |
|           | 5.999@I   |         | I         |
|           | ( .048)I  |         | I         |
|           | ( 5.987@I |         | I         |
|           | I         |         | I         |
| E46 - SN  | .172*I    |         | I         |
|           | .054 I    |         | I         |
|           | 3.196@I   |         | I         |
|           | ( .064)I  |         | I         |
|           | ( 2.708@I |         | I         |
|           | I         |         | I         |
| E47 - YP  | .167*I    |         | I         |

E48 - YN

.026 I  
6.371@I  
( .040)I  
( 4.198@I  
I  
.295\*I  
.049 I  
6.090@I  
( .052)I  
( 5.645@I  
I

I  
I  
I  
I  
I  
I  
I  
I  
I  
I  
I

02-Aug-18      PAGE : 10   EQS      Licensee:  
TITLE:    Model built by EQS 6 for Windows

MAXIMUM LIKELIHOOD SOLUTION (NORMAL DISTRIBUTION THEORY)

COVARIANCES AMONG INDEPENDENT VARIABLES

-----  
STATISTICS SIGNIFICANT AT THE 5% LEVEL ARE MARKED WITH @.

|           | E         | D   |   |
|-----------|-----------|-----|---|
|           | ---       | --- |   |
| E45 - SP  | .090*I    |     | I |
| E43 - PRP | .032 I    |     | I |
|           | 2.837@I   |     | I |
|           | ( .031) I |     | I |
|           | ( 2.950@I |     | I |
|           | I         |     | I |

02-Aug-18      PAGE : 11   EQS      Licensee:  
TITLE:    Model built by EQS 6 for Windows

MAXIMUM LIKELIHOOD SOLUTION (NORMAL DISTRIBUTION THEORY)

STANDARDIZED SOLUTION:

R-SQUARED

|     |        |          |   |          |      |
|-----|--------|----------|---|----------|------|
| PRP | =V43 = | .592 F1  | + | .806 E43 | .351 |
| PRN | =V44 = | .711*F1  | + | .703 E44 | .506 |
| SP  | =V45 = | .618*F1  | + | .786 E45 | .382 |
| SN  | =V46 = | .863*F1  | + | .505 E46 | .745 |
| YP  | =V47 = | .517*F1  | + | .856 E47 | .267 |
| YN  | =V48 = | .606*F1  | + | .796 E48 | .367 |
| F1  | =F1 =  | -.113*V4 | + | .994 D1  | .013 |



02-Aug-18      PAGE : 12   EQS      Licensee:  
TITLE:    Model built by EQS 6 for Windows

MAXIMUM LIKELIHOOD SOLUTION (NORMAL DISTRIBUTION THEORY)

CORRELATIONS AMONG INDEPENDENT VARIABLES

|           | E   |        | D   |   |
|-----------|-----|--------|-----|---|
|           | --- |        | --- |   |
| E45 - SP  |     | .363*I |     | I |
| E43 - PRP |     | I      |     | I |
|           |     | I      |     | I |

-----  
E N D      O F      M E T H O D  
-----

02-Aug-18            PAGE : 13   EQS        Licensee:  
TITLE:    Model built by EQS 6 for Windows

MAXIMUM LIKELIHOOD SOLUTION (NORMAL DISTRIBUTION THEORY)

WALD TEST (FOR DROPPING PARAMETERS)  
ROBUST INFORMATION MATRIX USED IN THIS WALD TEST  
MULTIVARIATE WALD TEST BY SIMULTANEOUS PROCESS

| CUMULATIVE MULTIVARIATE STATISTICS |           |            |      |             | UNIVARIATE INCREMENT |             |
|------------------------------------|-----------|------------|------|-------------|----------------------|-------------|
| -----                              |           |            |      |             | -----                |             |
| STEP                               | PARAMETER | CHI-SQUARE | D.F. | PROBABILITY | CHI-SQUARE           | PROBABILITY |
| ----                               | -----     | -----      | ---- | -----       | -----                | -----       |
| 1                                  | F1,V4     | .829       | 1    | .362        | .829                 | .362        |

02-Aug-18            PAGE : 14   EQS        Licensee:  
 TITLE:    Model built by EQS 6 for Windows

MAXIMUM LIKELIHOOD SOLUTION (NORMAL DISTRIBUTION THEORY)

LAGRANGE MULTIPLIER TEST (FOR ADDING PARAMETERS)

ORDERED UNIVARIATE TEST STATISTICS:

| NO | CODE  |    | PARAMETER | CHI-<br>SQUARE | PROB. | HANCOCK<br>13 DF<br>PROB. | PARAMETER<br>CHANGE | STANDAR-<br>DIZED<br>CHANGE |
|----|-------|----|-----------|----------------|-------|---------------------------|---------------------|-----------------------------|
| -- | ----- |    | -----     | -----          | ----- | -----                     | -----               | -----                       |
| 1  | 2     | 11 | V46,V4    | 4.568          | .033  | .984                      | .006                | .000                        |
| 2  | 2     | 11 | V43,V4    | 4.082          | .043  | .990                      | -.004               | .000                        |
| 3  | 2     | 11 | V48,V4    | 3.337          | .068  | .996                      | -.005               | .000                        |
| 4  | 2     | 11 | V44,V4    | .304           | .582  | 1.000                     | .002                | .000                        |
| 5  | 2     | 11 | V45,V4    | .104           | .747  | 1.000                     | -.001               | .000                        |
| 6  | 2     | 11 | V47,V4    | .023           | .879  | 1.000                     | .000                | .000                        |
| 7  | 2     | 0  | V43,F1    | .000           | 1.000 | 1.000                     | .000                | .000                        |

02-Aug-18      PAGE : 15   EQS      Licensee:  
TITLE:    Model built by EQS 6 for Windows

MAXIMUM LIKELIHOOD SOLUTION (NORMAL DISTRIBUTION THEORY)

MULTIVARIATE LAGRANGE MULTIPLIER TEST BY SIMULTANEOUS PROCESS IN STAGE    1

PARAMETER SETS (SUBMATRICES) ACTIVE AT THIS STAGE ARE:

PVV PFV PFF PDD GVV GVF GFV GFF BVF BFF

| CUMULATIVE MULTIVARIATE STATISTICS |           |            |      |       | UNIVARIATE INCREMENT |       |                                 |       |
|------------------------------------|-----------|------------|------|-------|----------------------|-------|---------------------------------|-------|
| -----                              |           |            |      |       | -----                |       |                                 |       |
| STEP                               | PARAMETER | CHI-SQUARE | D.F. | PROB. | CHI-SQUARE           | PROB. | HANCOCK'S<br>SEQUENTIAL<br>D.F. | PROB. |
| ----                               | -----     | -----      | ---- | ----- | -----                | ----- | ----                            | ----- |
| 1                                  | V46,V4    | 4.568      | 1    | .033  | 4.568                | .033  | 13                              | .984  |

LAGRANGIAN MULTIPLIER TEST REQUIRED      4049 WORDS OF MEMORY.  
PROGRAM ALLOCATES    2000000 WORDS.

1

Execution begins at 02:32:25  
Execution ends    at 02:32:26  
Elapsed time =      1.00 seconds
